# Supplementary material for: Exploring Viral Diversity in a Unique South African Soil Habitat
Source: PubMed Central journal article supplement (PMC5758573; doi:10.1038/s41598-017-18461-0), 2018-01-08
Supplement: 41598_2017_18461_MOESM1_ESM.pdf [file 41598_2017_18461_MOESM1_ESM.pdf]

## SUPPLEMENTARY PAPER

### Exploring Viral Diversity In A Unique South African Soil Habitat

*Jane Segobola<sup>1,2</sup>, Evelien Adriaenssens<sup>2</sup>, Tsepo Tsekoa<sup>1</sup>, Konanani Rashamuse<sup>1</sup> and Don Cowan<sup>2</sup>*

*<sup>1</sup>Biosciences Unit, Council for Scientific and Industrial Research (CSIR), Pretoria, South Africa*

*<sup>2</sup> Centre For Microbial Ecology and Genomics, University Of Pretoria, Pretoria, South Africa*

*Corresponding Author: : Don Cowan, Centre for Microbial Ecology and Genomics, Department of Genetics, University of Pretoria, Hatfield 0028, Pretoria, South Africa. Tel: +27 (12) 420 5873, [don.cowan@up.ac.za](mailto:don.cowan@up.ac.za)*

SUPPLEMENTARY FIGURES:

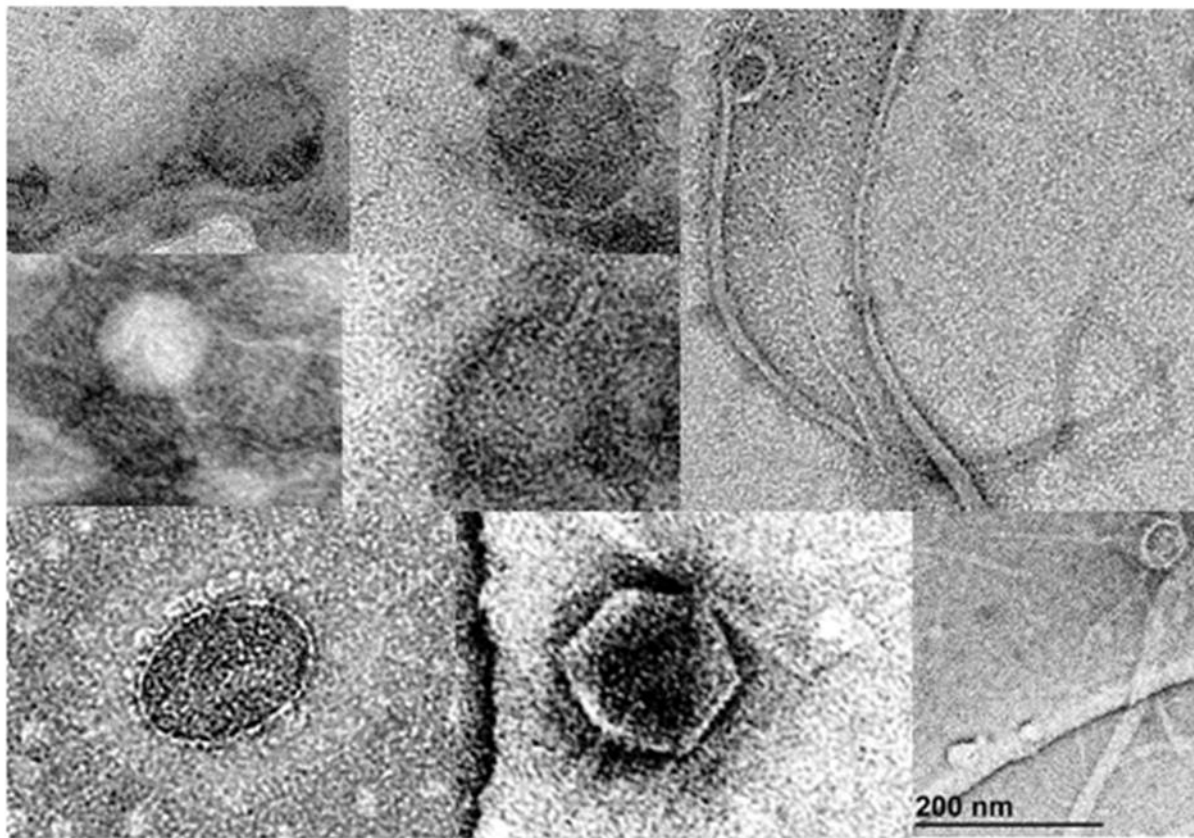

**Supplementary Figure S1: Transmission electron micrographs of the viral particles obtained from KBR.** Scale bars correspond to 200 nm. Particles were negatively stained with 2% uranyl acetate. Virus particles observed either belong to the families *Siphoviridae*, *Myoviridae* or are of an undetermined shape (VLP)

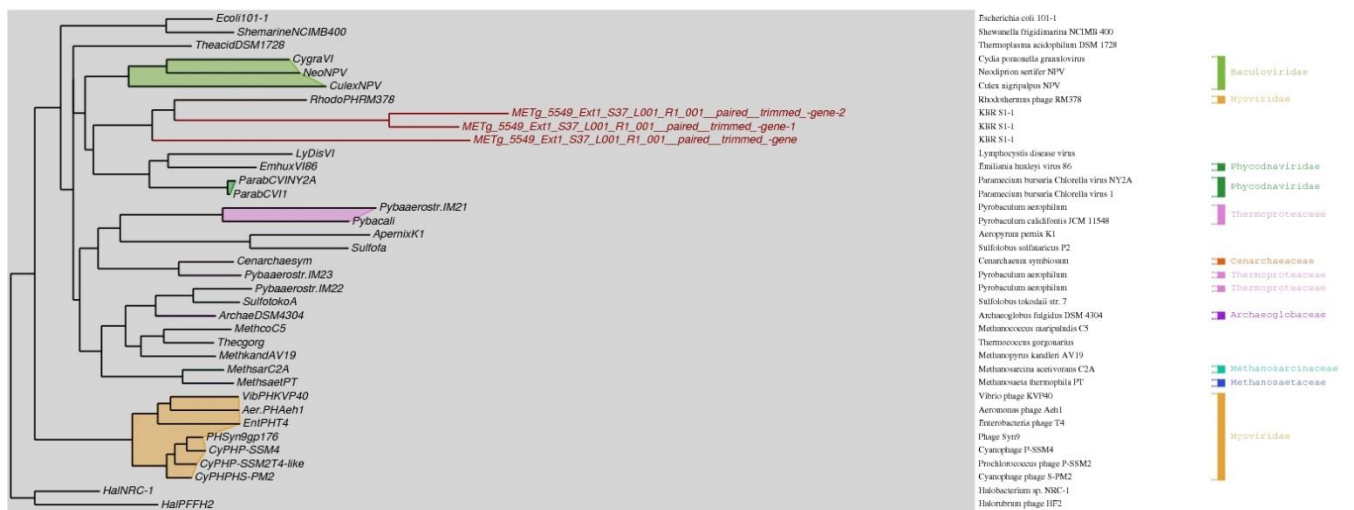

**Supplementary Figure S2: Phylogenetic tree of Pol B Marker gene amino acid sequences of the Kogelberg Biosphere reserve sequences – Red.** Reference sequences are coloured according to their taxonomy: *Baculoviridae* – light green, *Myoviridae* – yellow, *Phycodnaviridae* – Dark green, *Thermoproteaceae* – Pink, *Cenarcheaceae* – Mustard, *Archaeoglobaceae* – Purple, *Methanosarcinaceae* – Turquoise, and *Methanosaetaceae* – Blue. Sequences were aligned with de novo assembly using CLC genomics workbench version 6.0.1 (CLC, Denmark) and visualised with MetaVir server <sup>1</sup>. Each tree is computed with 100 bootstraps, and the resulting values are indicated for each node. Scale bar indicates the number of substitutions per site.

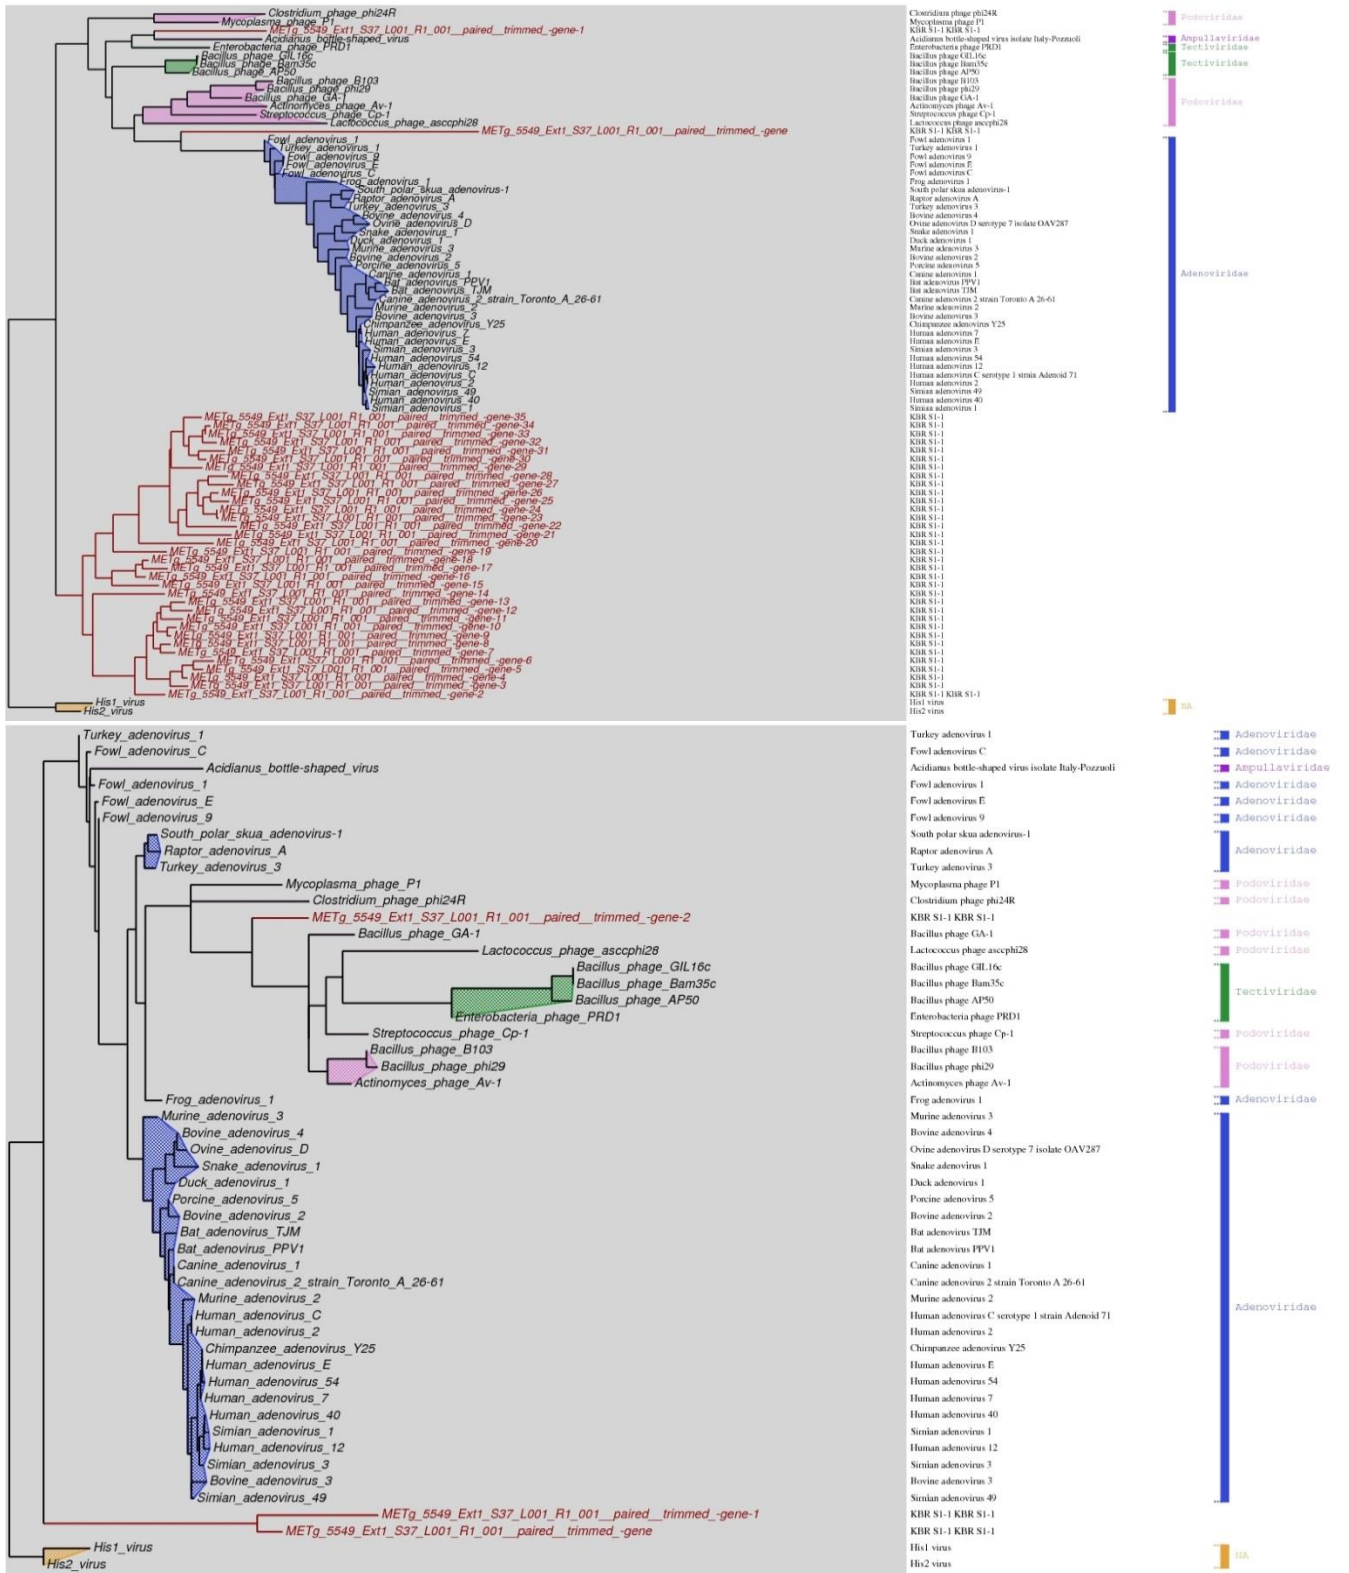

**Supplementary Figure S3: Phylogenetic tree of Pol B1 Marker gene amino acid sequences of the Kogelberg Biosphere reserve sequences – Red.** Reference sequences are coloured according to their taxonomy: *Podoviridae* – Pink, *Ampullariidae* – Purple, *Tectiviridae* – green, *Adenoviridae* – Blue, Not assigned any Family – Yellow. Sequences

were aligned with de novo assembly using CLC genomics workbench version 6.0.1 (CLC, Denmark) and visualised with MetaVir server <sup>1</sup>. Each tree is computed with 100 bootstraps, and the resulting values are indicated for each node. Scale bar indicates the number of substitutions per site.

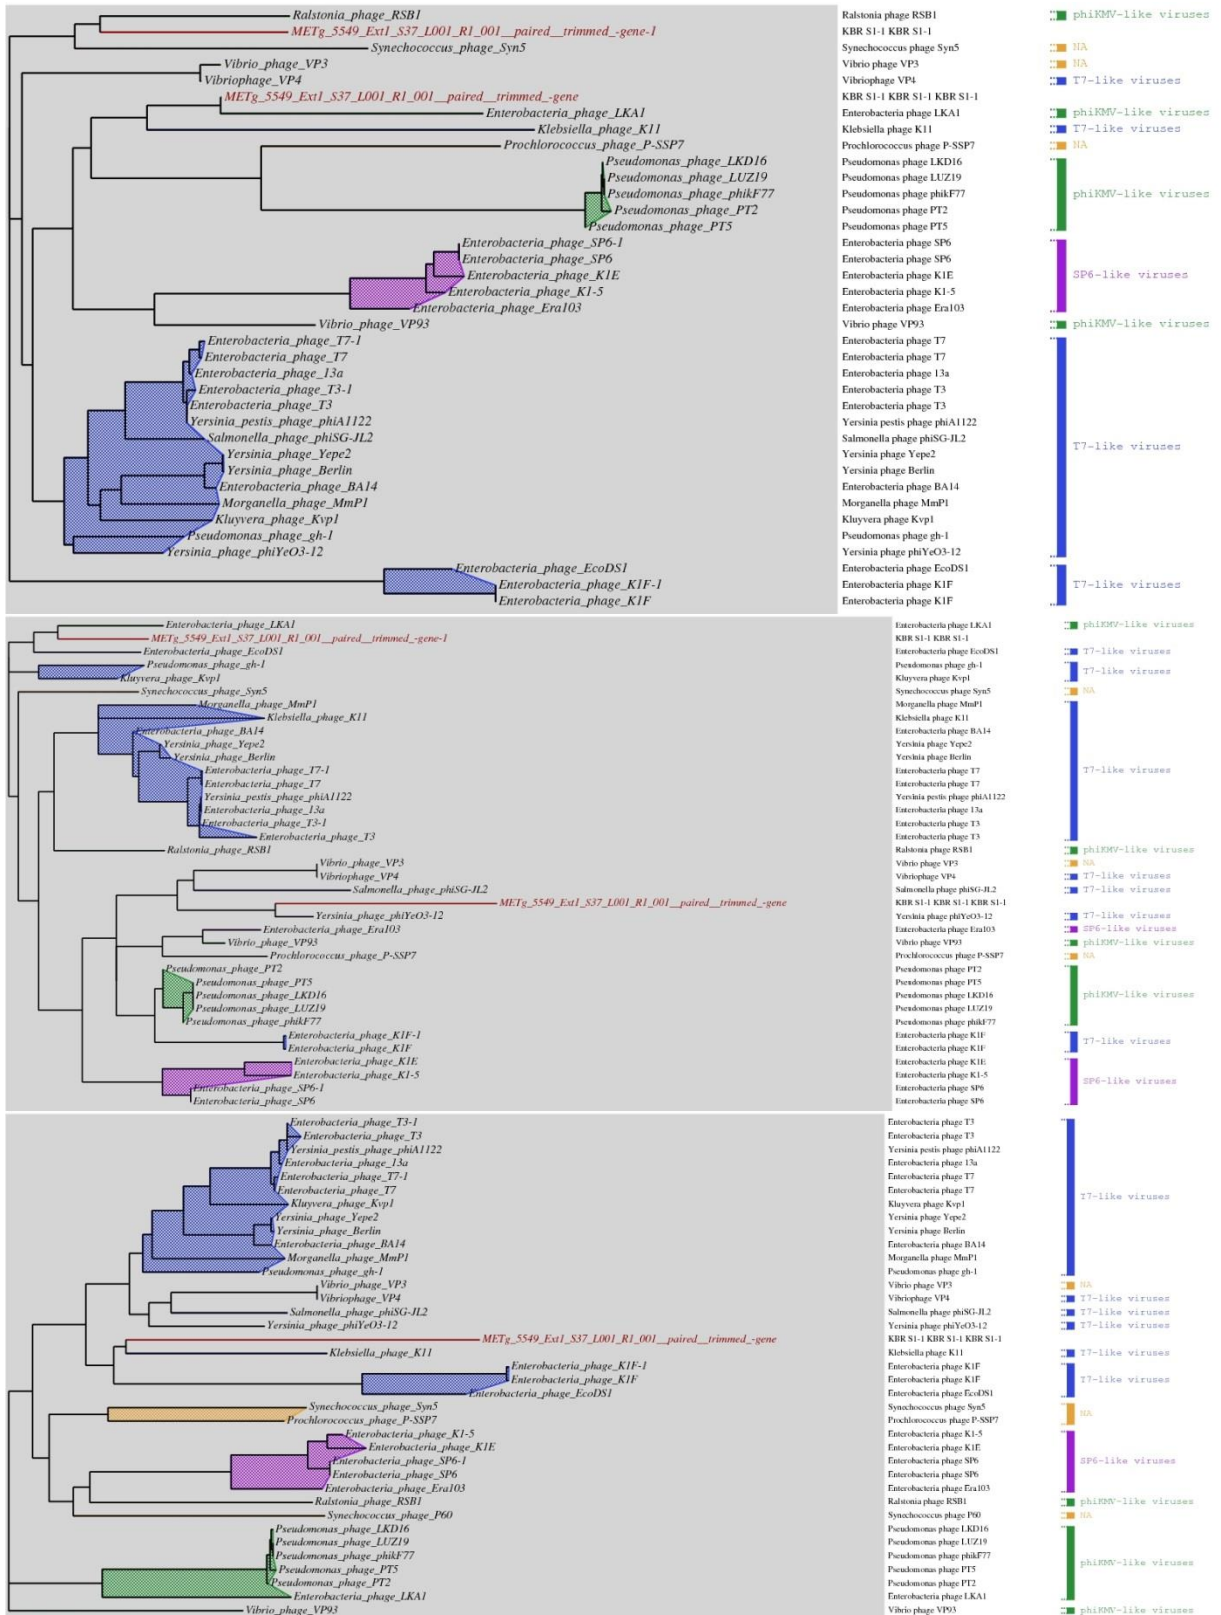

**Supplementary Figure S4: Phylogenetic tree of T7gp17 Marker gene amino acid sequences of the Kogelberg Biosphere reserve sequences – Red. Reference sequences are coloured according to their taxonomy: phiKMV-like viruses – green, T7-like viruses – Blue,**

SP6-like viruses – Purple, not assigned any family. Sequences were aligned with de novo assembly using CLC genomics workbench version 6.0.1 (CLC, Denmark) and visualised with MetaVir server <sup>1</sup>. Each tree is computed with 100 bootstraps, and the resulting values are indicated for each node. Scale bar indicates the number of substitutions per site.

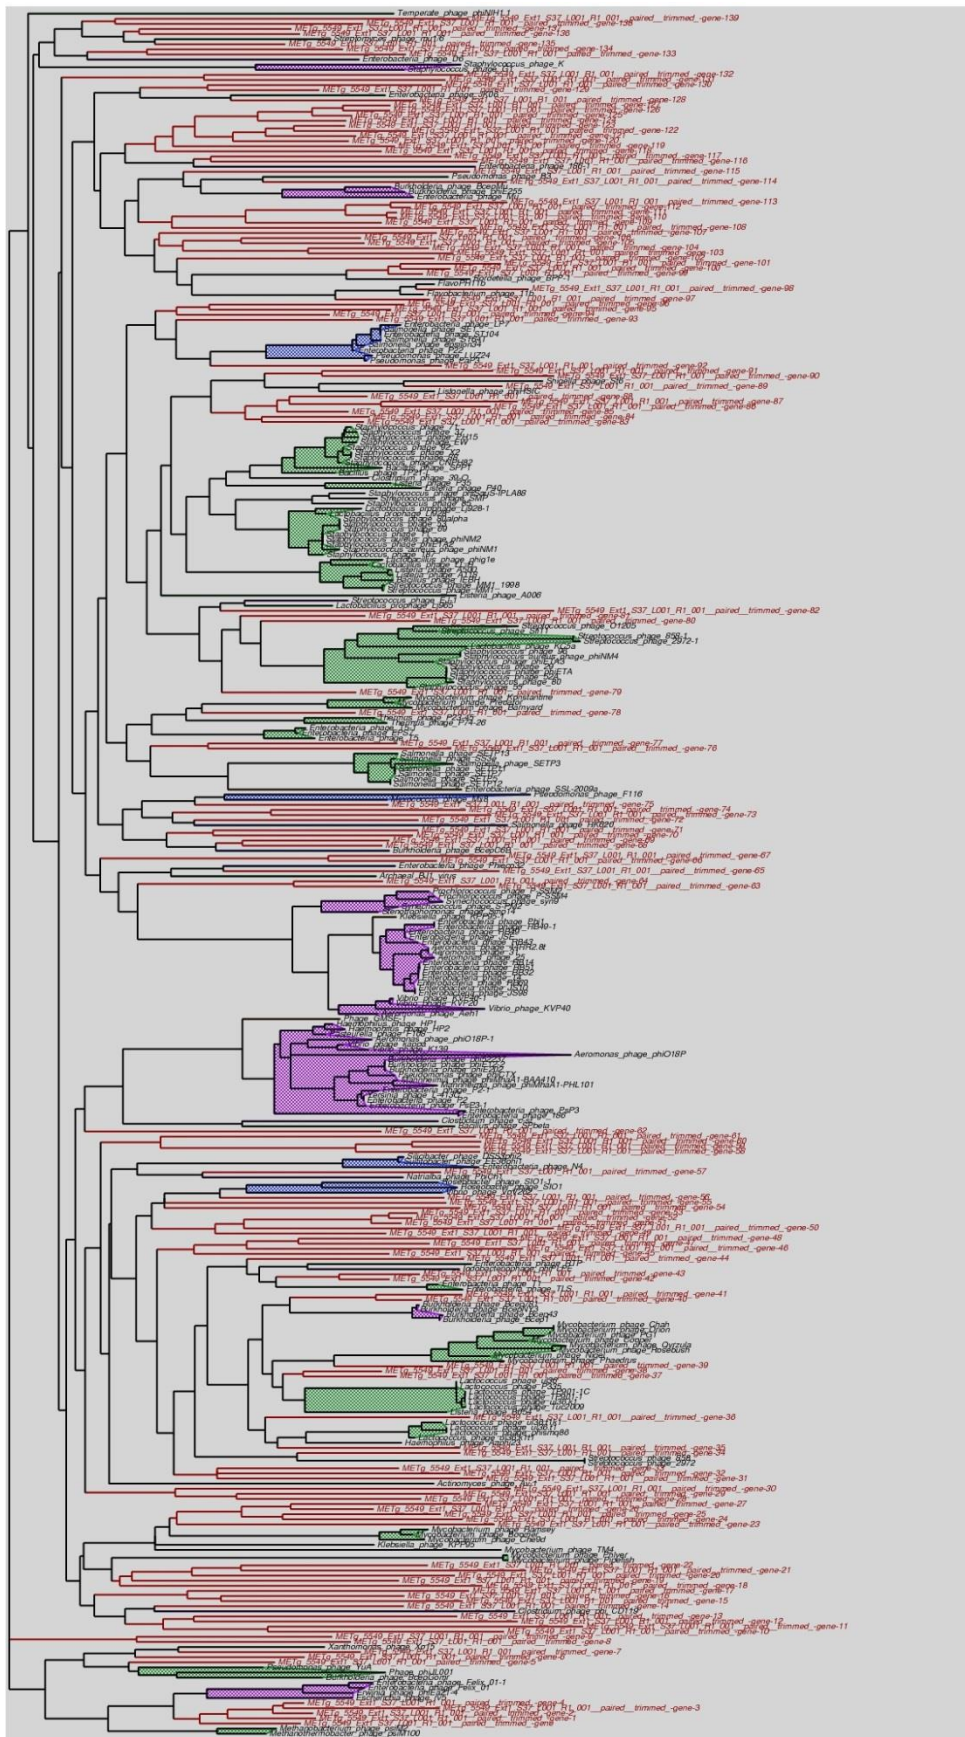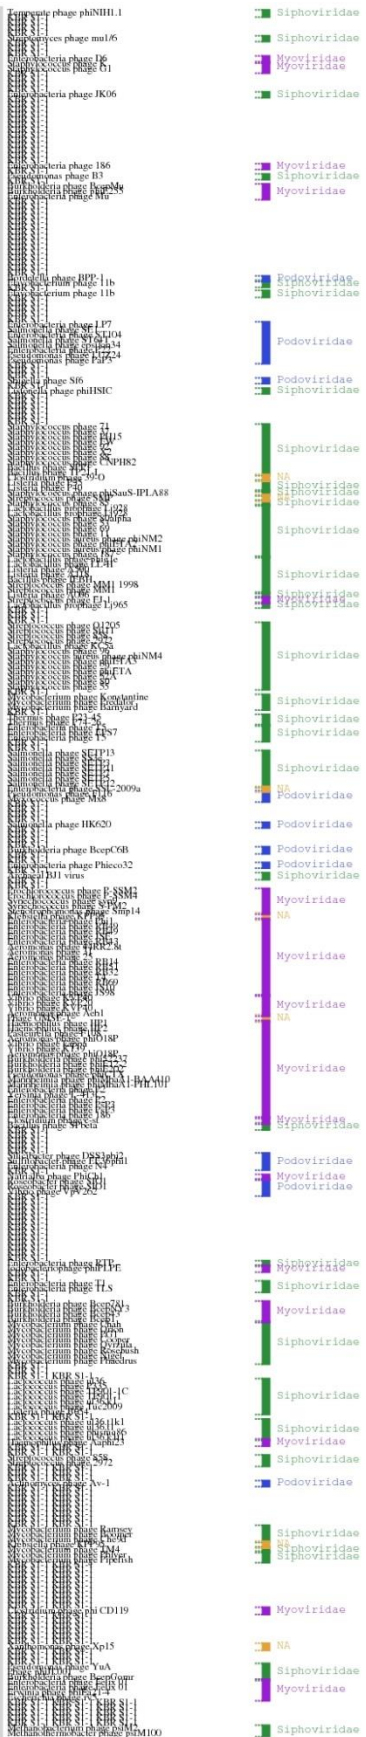



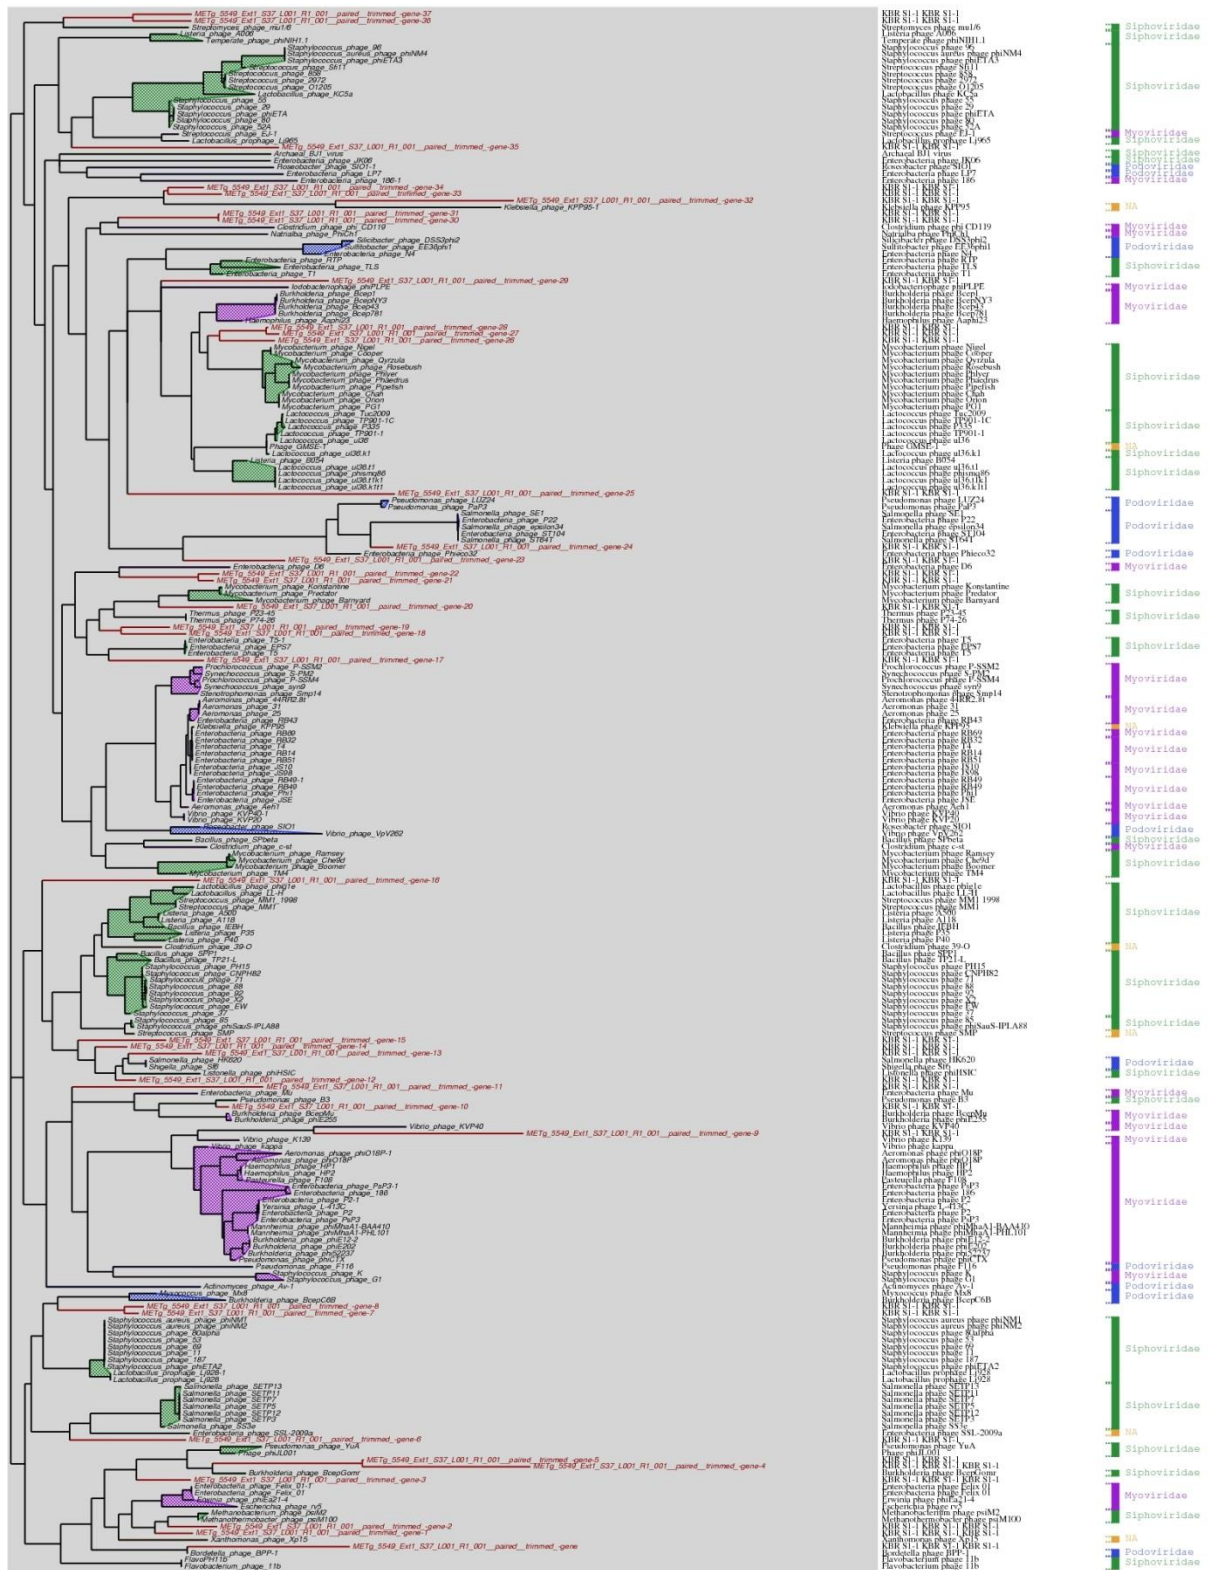

**Supplementary Figure S5: Phylogenetic tree of TerL Marker gene amino acid sequences of the Kogelberg Biosphere reserve sequences – Red.** Reference sequences are coloured according to their taxonomy: *Siphoviridae* – Green, *Myoviridae* – Purple, *Podoviridae* – Blue, Not assigned family – yellow Sequences were aligned with de novo

assembly using CLC genomics workbench version 6.0.1 (CLC, Denmark) and visualised with MetaVir server <sup>1</sup>. Each tree is computed with 100 bootstraps, and the resulting values are indicated for each node. Scale bar indicates the number of substitutions per site.

**Supplementary Table S1: Comparisons of functional and taxonomic analysis between VIROME and MetaVir**

| <b>Functional analysis</b> | <b>VIROME</b> | <b>MetaVir</b> |
|----------------------------|---------------|----------------|
| Hypothetical proteins      | 1359          | 46457          |
| glycoside hydrolase        | 124           | 83             |
| gp11                       | 11            | 39             |
| YapH protein               | 1             | 2              |
| HNH homing endonuclease    | 6             | 26             |
| Helicase                   | 231           | 277            |
| Primase                    | 77            | 93             |
| pyrophosphatase            | 2             | 1              |
| DNA polymerase             | 417           | 287            |
| terminase large subunit    | 95            | 316            |
| Lysine                     | 19            | 95             |
| endonuclease               | 117           | 198            |
| structural protein         | 61            | 101            |
| phage-related protein      | 52            | 7              |
|                            |               |                |
| <b>Taxonomic analysis</b>  | <b>VIROME</b> | <b>MetaVir</b> |
| <i>Caudovirales</i>        | 1118          | 25922          |

|                        |    |     |
|------------------------|----|-----|
| <i>Phycodnaviridae</i> | 20 | 499 |
| <i>Ampullaviridae</i>  | 1  | 173 |
| <i>Mimiviridae</i>     | 1  | 110 |

**Supplementary Table S2: Sample description of taxonomic abundance of the 10 largest contigs**

| Contigs name                                              | Contigs length | #of predicted genes | Predicted genes                                                                                                                                                                                                                                                      | #Hypothetical proteins |
|-----------------------------------------------------------|----------------|---------------------|----------------------------------------------------------------------------------------------------------------------------------------------------------------------------------------------------------------------------------------------------------------------|------------------------|
| 5549_Ext1_S37_L00<br>1_R1_001__paired__t<br>rimmed__p_414 | 47854          | 63                  | terminase, glucosaminidase,<br>phage_integrase                                                                                                                                                                                                                       | 57                     |
| 5549_Ext1_S37_L00<br>1_R1_001__paired__t<br>rimmed__p_53  | 44760          | 58                  | putative terminase large subunit,<br>Peptidase_S74, endolysin, Lipase,<br>putative DNA polymerase, putative<br>DNA helicase putative adenine<br>methyltransferase                                                                                                    | 48                     |
| 5549_Ext1_S37_L00<br>1_R1_001__paired__t<br>rimmed__p_458 | 42564          | 61                  | putative endonuclease, putative<br>terminase large subunit                                                                                                                                                                                                           | 52                     |
| 5549_Ext1_S37_L00<br>1_R1_001__paired__t<br>rimmed__p_185 | 42057          | 53                  | putative phage terminase large<br>subunit, putative peptidase, putative<br>lytic tail protein, putative<br>endolysin, putative DNA<br>methyltransferase, putative DNA<br>helicase, putative RecB family<br>exonuclease, putative primase,<br>putative DNA polymerase | 27                     |

|                                                           |       |    |                                                                                                                                                                                                                                                                                                                                        |               |    |
|-----------------------------------------------------------|-------|----|----------------------------------------------------------------------------------------------------------------------------------------------------------------------------------------------------------------------------------------------------------------------------------------------------------------------------------------|---------------|----|
| 5549_Ext1_S37_L00<br>1_R1_001__paired__t<br>rimmed__p_9   | 41177 | 68 | putative endolysin,<br>terminase large subunit                                                                                                                                                                                                                                                                                         | putative      | 53 |
| 5549_Ext1_S37_L00<br>1_R1_001__paired__t<br>rimmed__p_90  | 40336 | 49 | putative terminase large subunit,<br>putative endoprotease,<br>major capsid protein,<br>endolysin, putative DNA<br>polymerase                                                                                                                                                                                                          | putative      | 33 |
| 5549_Ext1_S37_L00<br>1_R1_001__paired__t<br>rimmed__p_259 | 36396 | 45 | Pectate_lyase,<br>putative terminase large subunit                                                                                                                                                                                                                                                                                     | Endonuclease, | 39 |
| 5549_Ext1_S37_L00<br>1_R1_001__paired__t<br>rimmed__p_645 | 36310 | 87 | RNA_ligase,<br>putative deoxycytidylate deaminase,<br>putative PseT polynucleotide 5'-<br>kinase and 3'-phosphatase, putative<br>RNA ligase                                                                                                                                                                                            | Endonuclease, | 67 |
| 5549_Ext1_S37_L00<br>1_R1_001__paired__t<br>rimmed__p_929 | 34830 | 43 | putative phage tail fiber-like<br>protein, putative tail fiber protein,<br>putative N-acetylmuramoyl-L-<br>alanine amidase, putative DNA<br>polymerase B region, putative<br>tRNA ribotransferase, putative<br>GTP cyclohydrolase, putative<br>glutamine amidotransferases class-<br>II, putative organic radical<br>activating enzyme |               | 21 |
| 5549_Ext1_S37_L00<br>1_R1_001__paired__t<br>rimmed__p_416 | 30995 | 34 | putative Mu-like prophage I protein,<br>putative tape measure protein,<br>Pectate_lyase, putative DNA-<br>binding protein                                                                                                                                                                                                              |               | 24 |

**Supplementary Table S3: Selected Biomes for viral composition comparison with KBR**

| <b>Table description</b> | <b>Sample name</b>           | <b>Project ID</b> | <b>Sample type</b> | <b>References</b> |
|--------------------------|------------------------------|-------------------|--------------------|-------------------|
| <b>KBR (s)</b>           | KBR sample 1                 | 5549              | soil               | Current study     |
| <b>AOS (s)</b>           | Antarctic open soil contigs  | 2473              | soil               | <sup>2</sup>      |
| <b>RF(s)</b>             | RF Peru                      | 4906              | Soil               | <sup>3</sup>      |
| <b>AH</b>                | Antarctic hypolith contigs   | 2472              | hypolith           | <sup>2</sup>      |
| <b>NH</b>                | Namib hypolith contigs       | 2186              | hypolith           | <sup>4</sup>      |
| <b>Far (fw)</b>          | Far-T4 Lake Pavin            | 5127              | fresh water        | <sup>5</sup>      |
| <b>LB (fw)</b>           | Lake Bourget                 | 1327              | fresh water        | <sup>6</sup>      |
| <b>LP (fw)</b>           | Lake Pavin                   | 1328              | fresh water        | <sup>6</sup>      |
| <b>57th (fw)</b>         | 57th_St_05-Jun-13            | 3305              | fresh water        | <sup>7</sup>      |
| <b>M1 (fw)</b>           | Montrose_05-Jun-13-1         | 3306              | fresh water        | <sup>7</sup>      |
| <b>M2 (fw)</b>           | Montrose_25-Jun-13-2         | 3307              | fresh water        | <sup>7</sup>      |
| <b>SP (p)</b>            | Salted pond                  | 25                | pond               | <sup>8</sup>      |
| <b>ALOHA (ds)</b>        | ALOHA_station_deep_aby<br>ss | 3816              | deep sea           | <sup>9</sup>      |
| <b>B47 (ds)</b>          | B47_Bohai_Sea_Sep_2010       | 5754              | sea                | <sup>9</sup>      |
| <b>P</b>                 | P._acuta_2012                | 2315              | unknown            | <sup>10</sup>     |
| <b>Sup05</b>             | Sup05_prophage_contigs       | 3232              | unknown            | <sup>11</sup>     |
| <b>VS</b>                | VirSorter_curated_dataset    | 5062              | unknown            | <sup>12</sup>     |
| <b>10eld</b>             | 10_eld_contigs               |                   | unknown            | <sup>13</sup>     |

## REFERENCES

1. Roux, S., Tournayre, J., Mahul, A., Debroas, D. & Enault, F. Metavir 2: new tools for viral metagenome comparison and assembled virome analysis. *BMC Bioinformatics* **15**, 76 (2014).
2. Zablocki, O., Adriaenssens, E. & Cowan, D. Diversity and ecology of viruses in hyperarid desert soils. *Appl. Environ. Microbiol.* **82**, AEM.02651-15- (2015).

3. Fierer, N. *et al.* Metagenomic and small-subunit rRNA analyses reveal the genetic diversity of bacteria, archaea, fungi, and viruses in soil. *Appl. Environ. Microbiol.* **73**, 7059–7066 (2007).
4. Adriaenssens, E. M. *et al.* Metagenomic analysis of the viral community in Namib Desert hypoliths. *Environ. Microbiol.* **17**, 480–495 (2015).
5. Roux, S. *et al.* Analysis of metagenomic data reveals common features of halophilic viral communities across continents. *Environ. Microbiol.* **18**, 889–903 (2015).
6. Roux, S. *et al.* Assessing the Diversity and Specificity of Two Freshwater Viral Communities through Metagenomics. *PLoS One* **7**, e33641 (2012).
7. Watkins, S. C. *et al.* Assessment of a metaviromic dataset generated from nearshore Lake Michigan. *Mar. Freshw. Res.* **67**, 1700 (2016).
8. Rodriguez-Brito, B. *et al.* Viral and microbial community dynamics in four aquatic environments. *Isme J* **4**, 739–751 (2010).
9. Angly, F. E. *et al.* The marine viromes of four oceanic regions. *PLoS Biol.* **4**, e368 (2006).
10. Wood-Charlson, E. M., Weynberg, K. D., Suttle, C. A., Roux, S. & van Oppen, M. J. H. Metagenomic characterization of viral communities in corals: mining biological signal from methodological noise. *Environ. Microbiol.* **17**, 3440–9 (2015).
11. Roux, S. *et al.* Ecology and evolution of viruses infecting uncultivated SUP05 bacteria as revealed by single-cell- and meta-genomics. *Elife* **3**, 1–20 (2014).
12. Roux, S., Hallam, S. J., Woyke, T. & Sullivan, M. B. Viral dark matter and virus-host interactions resolved from publicly available microbial genomes. *Elife* **4**, e08490 (2015).
13. Kim, M.-S., Park, E.-J., Roh, S. W. & Bae, J.-W. Diversity and Abundance of Single-Stranded DNA Viruses in Human Feces. *Appl. Environ. Microbiol.* **77**, 8062–8070 (2011).
